# Supplementary material for: Cu-decorated Sc 2 CFN monolayer for efficient CO 2 capture and activation
Source: Royal Society of Chemistry journal article supplement (doi:10.1039/d5ta06309d), 2025-10-14
Supplement: d5ta06309d1.pdf [file d5ta06309d1.pdf]

## **Cu-Decorated Sc<sub>2</sub>CFN Monolayer for Efficient CO<sub>2</sub> Capture and Activation**

Rajesh Chitara <sup>a), b)</sup>, Amee Mehta <sup>a)</sup>, Kirill A. Nekrasov <sup>c)</sup>, P.N. Gajjar, <sup>b), \*</sup> and Sanjeev K. Gupta <sup>a), \*</sup>

<sup>a)</sup> Computational Materials and Nanoscience Group, Department of Physics and Electronics,  
St. Xavier's College, Ahmedabad 380009, India

<sup>b)</sup> Department of Physics, University School of Sciences, Gujarat University, Ahmedabad  
380009, India

<sup>c)</sup> Department of Technical Physics, Institute of Physics and Technology, Ural Federal  
University Named after the First President of Russia B.N. Yeltsin, Ekaterinburg 620002,  
Russia

**Equal Contribution \$:** Rajesh Chitara<sup>a), b)</sup>, Amee Mehta<sup>a)</sup>

**\*Corresponding authors:** Dr Sanjeev K. Gupta (E-mail: [sanjeev.gupta@sxca.edu.in](mailto:sanjeev.gupta@sxca.edu.in)) and Prof.  
P. N. Gajjar (E-mail: [pngajjar@gujaratuniversity.ac.in](mailto:pngajjar@gujaratuniversity.ac.in))

**Keywords:** Density functional theory (DFT), Photocatalysis, CO<sub>2</sub> capture, Carbon dioxide capture and activation

## Supplementary data

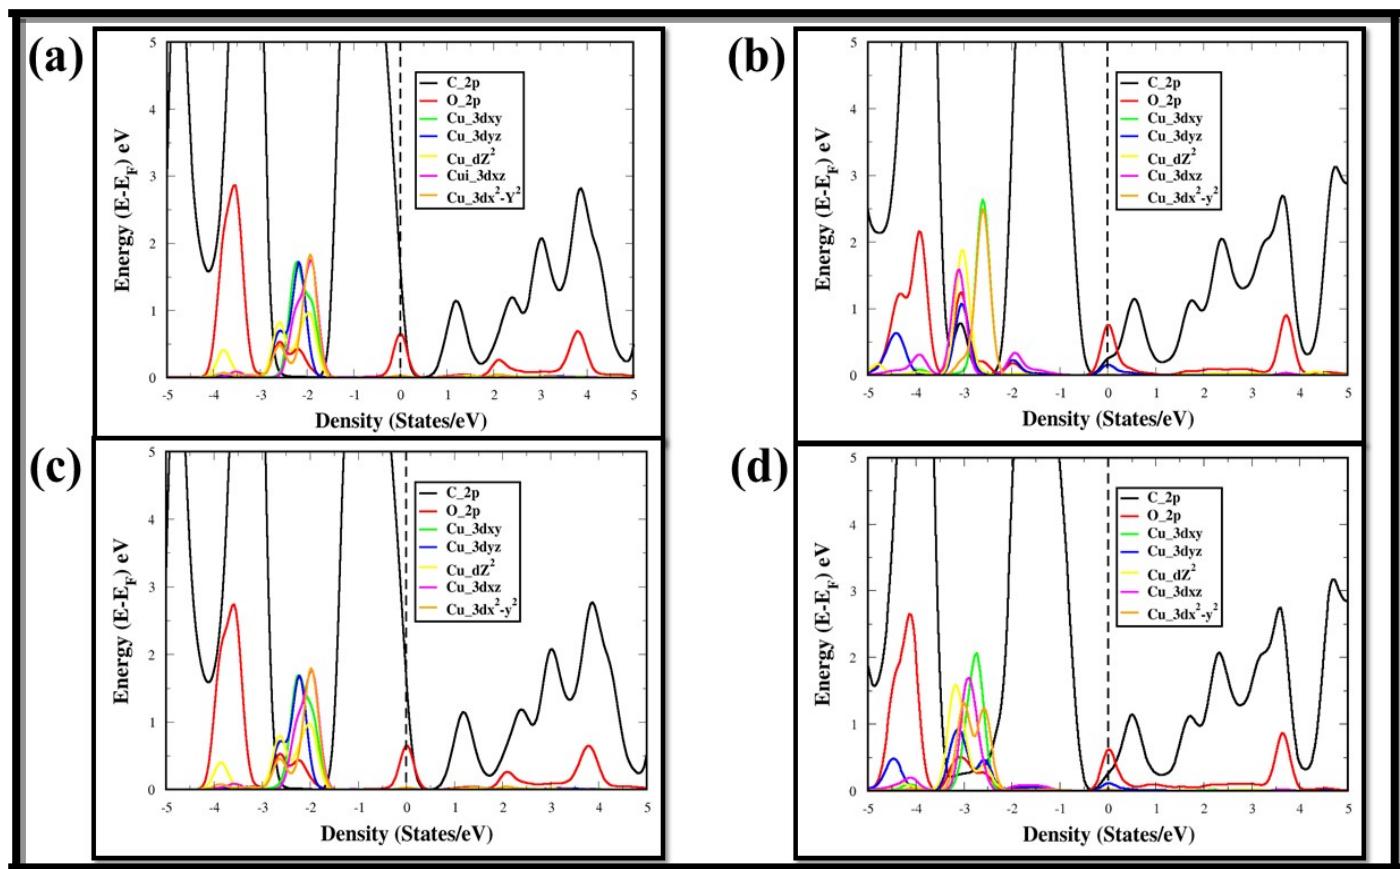

Figure S1. Shows Projected density of states (PDOS) showing the interaction between Cu 3d orbitals and CO<sub>2</sub> 2p orbitals at different adsorption sites of Cu-decorated Sc<sub>2</sub>CFN: (a) N, (b) F, (c) Sc+F, and (d) Sc+N. The strongest hybridization occurs at the N-site,

The orbital-resolved PDOS analysis (Figure S1) provides insight into the interaction mechanism between the Cu atom and CO<sub>2</sub> molecules adsorbed on different sites of the Sc<sub>2</sub>CFN surface. In all cases, there is noticeable overlap between the **Cu 3d orbitals** and the **CO<sub>2</sub> O-2p states** in the energy range from -5 eV to 0 eV, confirming hybridization and charge transfer that contribute to CO<sub>2</sub> activation.

- At the **N-terminated site (Figure S1a)**, the **Cu 3d<sub>xz</sub> and 3d<sub>yz</sub> orbitals** exhibit the strongest overlap with the O-2p orbitals, consistent with the enhanced bending of CO<sub>2</sub> and higher adsorption energy.
- At the **F-terminated site (Figure S1b)**, the overlap is weaker and mainly involves the **Cu 3d<sub>xy</sub> orbital**, leading to less pronounced CO<sub>2</sub> activation.
- For the **Sc+F site (Figure S1c)**, hybridization occurs through the **3d<sub>xz</sub>/3d<sub>yz</sub> and 3d<sub>x<sup>2</sup>-y<sup>2</sup> orbitals</sub>**, resulting in moderate CO<sub>2</sub> activation compared to the N-site.
- At the **Sc+N site (Figure S1d)**, partial contributions from **3d<sub>z<sup>2</sup></sub>** and **3d<sub>xz</sub> orbitals** are observed, but the overlap is weaker compared to the N-site, consistent with lower activation strength.

Overall, these results confirm that the N-terminated Cu-decorated  $\text{Sc}_2\text{CFN}$  provides the most favourable orbital interactions for  $\text{CO}_2$  activation, with the **Cu  $3d_{xz}/3d_{yz}$  orbitals** playing the dominant role in hybridization with the O-2p orbitals of  $\text{CO}_2$ .

For the N-activated site, the adsorption is characterized by significant overlap between the C-2p/O-2p states of  $\text{CO}_2$  and the Cu- $d_{xz}/d_{yz}$  orbitals ( $-4.0$  to  $-2.0$  eV), with weaker contributions from Cu- $dz^2$ . This indicates that  $\text{CO}_2$  interacts preferentially through lateral d-orbitals when coordinated to N, contrasting with the F-activated site where the Cu- $dz^2$  orbital dominates.

The interaction between  $\text{CO}_2$  and the F-activated Cu center is mediated primarily by the Cu- $d_{z^2}$  orbital, evidenced by its pronounced energy-aligned overlap with C-2p/O-2p features ( $\approx -3.5$  to  $-1.0$  eV) and residual mixing around  $E_F$ , while  $dxz/dyz$  contribute weakly and  $dxy/dx^2-y^2$  show minimal participation. At the Sc+F co-doped site, the PDOS reveals that the Cu- $dxz$  and  $dyz$  orbitals are primarily responsible for hybridization with the C-2p/O-2p states in the  $-4.5$  to  $-2.5$  eV region. In addition, weaker contributions from Cu- $dz^2$  and  $dx^2-y^2$  are evident, suggesting a more complex multi-orbital interaction compared with the isolated F or N active sites. For the Sc+N co-doped site, the interaction of  $\text{CO}_2$  with the Cu center involves significant contributions from the in-plane Cu- $dxy$ ,  $dxz$ , and  $dyz$  orbitals, which overlap strongly with C-2p/O-2p states around  $-4.0$  to  $-2.0$  eV. Additionally, moderate involvement of Cu- $dz^2$  and  $dx^2-y^2$

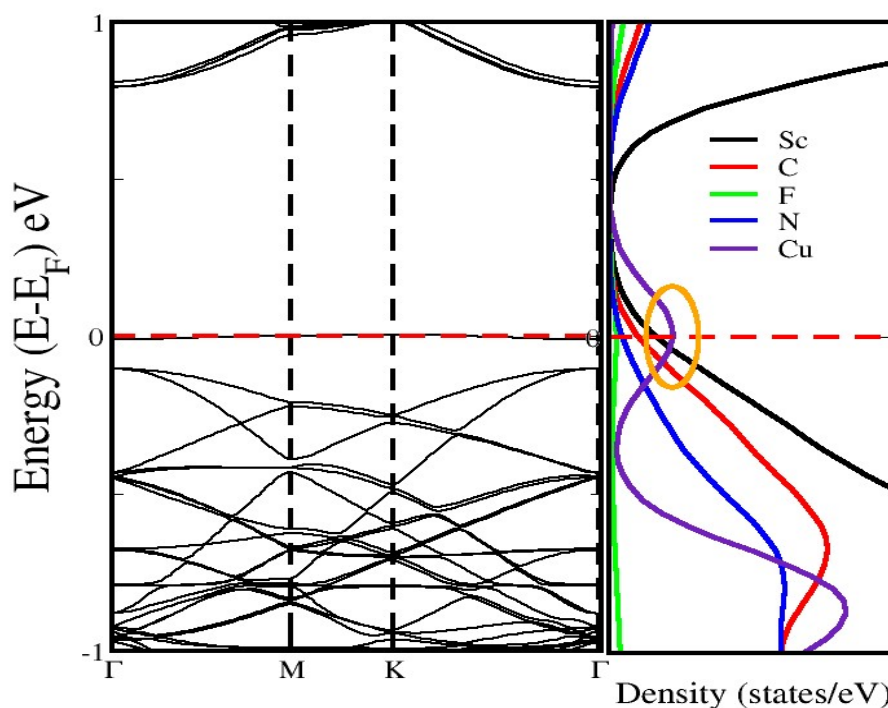

Figure S2. Electronic band structure and projected density of states (PDOS) of the Cu-doped  $\text{Sc}_2\text{CFN}$  monolayer. The Fermi level is set to zero (red dashed line). The system retains an indirect band gap nature, while the gap value is reduced due to Cu-induced states. Strong hybridization between Cu, Sc, and N orbitals near the Fermi level (highlighted region) indicates enhanced electronic interactions that narrow the band gap.

$y^2$  orbitals is detected, pointing to a more delocalized and multi-orbital hybridization mechanism than in either the F- or N-only sites

Here, in Figure S2 Shows the indirect nature of the band gap remains in the Cu-doped F-active site of  $\text{Sc}_2\text{CFN}$  monolayer, as the VBM and CBM still occur at different k-points. However, the band gap value is reduced (narrowed) compared to pristine  $\text{Sc}_2\text{CFN}$ , due to the Cu-induced states near the Fermi level. In fact, if the Cu contribution is strong enough, (shown in orange circle) the system can even approach semi metallic behavior depending on the doping concentration.

Table S1. Adsorption energies ( $E_{\text{ads}}$ , in eV) of  $\text{CO}_2$  on Cu-decorated  $\text{Sc}_2\text{CFN}$  monolayer for horizontal ( $\text{HCO}_2$ ) and vertical ( $\text{VCO}_2$ ) configurations at different adsorption sites.

| Adsorption Site | $E_{\text{ads}} (\text{HCO}_2)$ [eV] | $E_{\text{ads}} (\text{VCO}_2)$ [eV] |
|-----------------|--------------------------------------|--------------------------------------|
| <b>F</b>        | <b>−0.60</b>                         | <b>−0.29</b>                         |
| <b>N</b>        | <b>−0.92</b>                         | <b>−0.43</b>                         |
| <b>Sc+F</b>     | <b>−0.83</b>                         | <b>−0.58</b>                         |
| <b>Sc+N</b>     | <b>−0.59</b>                         | <b>−0.71</b>                         |

Table S2. Adsorption energies ( $E_{\text{ads}}$ , in eV) of Cu on  $\text{Sc}_2\text{CFN}$  monolayer at different adsorption sites calculated with vdW correction

| Adsorption Site | $E_{\text{ads}} (\text{eV})$ |
|-----------------|------------------------------|
| <b>F</b>        | −0.67                        |
| <b>N</b>        | −1.70                        |
| <b>Sc+F</b>     | −1.27                        |
| <b>Sc+N</b>     | −1.82                        |

Table S3. Adsorption energies ( $E_{\text{ads}}$ , in eV) of  $\text{CO}_2$  on Cu-decorated  $\text{Sc}_2\text{CFN}$  monolayer at different adsorption sites, calculated with vdW correction

| Adsorption Site | $E_{\text{ads}} (\text{eV})$ |
|-----------------|------------------------------|
| <b>F</b>        | −2.49                        |
| <b>N</b>        | −1.95                        |
| <b>Sc+F</b>     | −1.89                        |
| <b>Sc+N</b>     | −1.53                        |

Table S4. Comparison of CO<sub>2</sub> adsorption energies (E<sub>ads</sub>, in eV) on different MXene systems from literature and this work.

| MXene system                                                     | E <sub>ads</sub> (eV) | Reference                                                                                                                             | Ref.No |
|------------------------------------------------------------------|-----------------------|---------------------------------------------------------------------------------------------------------------------------------------|--------|
| Ti <sub>2</sub> CO <sub>2</sub>                                  | −0.45 to −1.10        | CO <sub>2</sub> abatement by two-dimensional MXene carbides                                                                           | 1      |
| V <sub>2</sub> CO <sub>2</sub>                                   | −0.60 to −1.30        | CO <sub>2</sub> abatement by two-dimensional MXene carbides                                                                           | 1      |
| Mo <sub>2</sub> CO <sub>2</sub>                                  | −0.50 to −1.20        | Carbon dioxide adsorption of two-dimensional Mo <sub>2</sub> C MXene                                                                  | 2      |
| W <sub>2</sub> C, Cr <sub>2</sub> C, Nb <sub>2</sub> C (various) | −1.22 to −3.65        | Carbon dioxide adsorption of two-dimensional Mo <sub>2</sub> C MXene                                                                  | 2      |
| Ti <sub>2</sub> C–Cu                                             | −1.40 to −2.00        | Ti <sub>2</sub> C MXene/activated carbon Nanocomposite for efficient CO <sub>2</sub> capture: Insights into thermodynamics properties | 3      |
| V <sub>2</sub> C–Cu                                              | −1.60 to −2.20        | Ti <sub>2</sub> C–MXene/activated carbon nanocomposite for efficient CO <sub>2</sub> capture: Insights into thermodynamics properties | 3      |
| Sc <sub>2</sub> CFN–Cu (this work)                               | <b>−1.53 to −2.49</b> | This work                                                                                                                             |        |

Table S4 compares our adsorption results with those of similar MXene systems reported in the literature. For pristine MXenes such as Ti<sub>2</sub>CO<sub>2</sub> and V<sub>2</sub>CO<sub>2</sub>, CO<sub>2</sub> adsorption energies typically range from −0.45 to −1.30 eV, indicative of moderate chemisorption. Metal decoration, such as Cu on Ti<sub>2</sub>C or V<sub>2</sub>C, strengthens adsorption into the range of −1.40 to −2.20 eV. In our case, Cu-decorated Sc<sub>2</sub>CFN exhibits adsorption energies between −1.53 and −2.49 eV (vdW corrected), which are in excellent agreement with reported Cu-decorated MXenes. Importantly, while Sc<sub>2</sub>CFN–Cu demonstrates strong activation, the adsorption energies remain below the extreme values ( $\approx$  −3.65 eV) observed for some pristine MXenes, suggesting that CO<sub>2</sub> desorption remains feasible under photocatalytic conditions.

## References

- 1 Á. Morales-García, A. Fernández-Fernández, F. Viñes and F. Illas, .
- 2 S. Jin, Y. Guo, J. Wang, L. Wang, Q. Hu and A. Zhou, *Diam Relat Mater*, 2022, **128**, 109277.
- 3 M. Aliyu, B. O. Yusuf, A. H. S. Abdullahi, A. I. Bakare, M. Umar, A. S. Hakeem and S. A. Ganiyu, *Sep Purif Technol*, 2024, **340**, 126737.
